# Supplementary material for: Habitat preference, movements and growth of giant mottled eels, Anguilla marmorata, in a small subtropical Amami-Oshima Island river
Source: PeerJ. 2020 Nov 3;8:e10187. doi: 10.7717/peerj.10187 (PMC7646302; doi:10.7717/peerj.10187)
Supplement: Data S1 [file peerj-08-10187-s002.xlsx]

## Sheet: eel catch data
date	number of large eels	number of small eels	number of all eels	samplimg section	width	depth	sediment	riverbank	velocity
2016-08-01	2	1	3	20	8.4	38	sand	sand	6.33333
2016-08-01	1	0	1	30	7.4	45	sand	concrete + vegetation	4.36667
2016-08-01	8	0	8	40	7.2	72	mud + boulder	concrete + vegetation	4.3
2016-08-01	11	0	11	50	7.9	48	mud + boulder	concrete + gravel	3.73333
2016-08-01	19	0	19	60	7.9	38	mud	concrete + boulder	4.5
2016-08-01	0	0	0	70	8	25	gravel	concrete + vegetation	8.8
2016-08-01	3	0	3	80	4.7	26	gravel	concrete + vegetation	4.8
2016-08-01	1	0	1	90	4.1	26	gravel	concrete + vegetation	8.63333
2016-08-01	2	3	5	100	3.7	16	gravel	concrete + vegetation	8.03333
2016-08-01	0	1	1	110	3.7	11	gravel	concrete	13.9333
2016-08-01	1	4	5	120	3.7	5	gravel	concrete	20.9333
2016-08-01	0	0	0	130	3.5	8	gravel	concrete + gravel	11.7333
2016-08-01	0	0	0	140	3.4	11	gravel	concrete + vegetation	14.8333
2016-08-01	0	0	0	150	1.7	13	gravel	concrete + boulder	26.2333
2016-08-01	1	2	3	160	1.3	13	gravel	concrete + boulder	32
2016-08-01	5	1	6	170	2.2	40	gravel	concrete + boulder	7.1
2016-08-01	5	2	7	180	1.8	27	gravel	concrete + vegetation	34.9667
2016-08-01	2	4	6	190	1.5	17	gravel	concrete + vegetation	49.8333
2016-08-01	5	0	5	200	1.6	14	gravel	concrete + vegetation	26.2667
2016-08-01	3	6	9	210	1.3	8	gravel	concrete + gravel	55.0667
2016-08-01	4	2	6	220	3	18	gravel	vegetation	25.3333
2016-08-01	4	3	7	230	2.2	9	gravel	vegetation	22.6667
2016-08-01	0	1	1	240	2.2	11	gravel	concrete + vegetation	20.6
2016-08-01	0	3	3	250	2.2	8	gravel	concrete + boulder	40.2667
2016-08-01	1	0	1	260	1.9	13	gravel	boulder	33.7667
2016-08-01	3	0	3	270	2.2	16	gravel	concrete + boulder	64.6
2016-08-01	3	2	5	280	2.2	8	gravel	boulder	22.5667
2016-08-01	3	2	5	290	1.9	48	gravel	boulder	8.26667
2016-08-01	4	2	6	300	2.7	9	gravel	boulder	30.1667
2016-08-01	2	0	2	310	2	75	mud	concrete + boulder	4.96667
2016-08-01	0	0	0	320	3.3	3	concrete or bedrock	concrete	52.9333
2016-08-01	0	0	0	330	2.9	5	concrete or bedrock	concrete	54.8667
2016-08-01	0	0	0	340	2.9	4	concrete or bedrock	concrete	44.7
2016-08-01	0	1	1	350	2.7	3	concrete or bedrock	concrete	38.5333
2016-08-01	1	0	1	360	0.5	18	boulder	boulder	35.3
2016-08-01	1	0	1	370	2.8	28	gravel	boulder	20.1667
2016-08-01	0	0	0	380	3.5	40	gravel	boulder	18.6
2016-08-01	0	0	0	390	3.6	13	gravel	boulder	38.0667
2016-08-01	2	0	2	400	2	15	gravel	boulder	19.6
2016-08-01	2	0	2	410	5	20	boulder	boulder	24
2016-08-01	2	0	2	420	3.6	52	gravel	boulder	36.2
2016-08-01	1	0	1	430	3	15	gravel	boulder	63.2
2016-08-01	2	1	3	440	1.6	13	gravel	boulder	54.4333
2016-08-01	2	0	2	450	1.4	30	gravel	boulder	11.3667
2016-08-01	2	0	2	460	1.3	28	gravel	boulder	26.4333
2016-08-01	0	0	0	470	1.7	36	gravel	boulder	14.0667
2016-08-01	1	0	1	480	1.4	14	boulder	boulder	35.8
2016-08-01	1	0	1	490	1.5	24	boulder	boulder	6.83333
2016-08-01	1	0	1	500	3	12	mud	boulder	13.0667
2016-08-01	0	0	0	510	6.1	20	gravel	boulder	39.1667
2016-11-01	0	0	0	20	8.4	38	sand	sand	6.33333
2016-11-01	0	0	0	30	7.4	45	sand	concrete + vegetation	4.36667
2016-11-01	2	0	2	40	7.2	72	mud + boulder	concrete + vegetation	4.3
2016-11-01	4	0	4	50	7.9	48	mud + boulder	concrete + gravel	3.73333
2016-11-01	12	0	12	60	7.9	38	mud	concrete + boulder	4.5
2016-11-01	0	1	1	70	8	25	gravel	concrete + vegetation	8.8
2016-11-01	1	0	1	80	4.7	26	gravel	concrete + vegetation	4.8
2016-11-01	2	3	5	90	4.1	26	gravel	concrete + vegetation	8.63333
2016-11-01	1	0	1	100	3.7	16	gravel	concrete + vegetation	8.03333
2016-11-01	0	0	0	110	3.7	11	gravel	concrete	13.9333
2016-11-01	0	1	1	120	3.7	5	gravel	concrete	20.9333
2016-11-01	0	0	0	130	3.5	8	gravel	concrete + gravel	11.7333
2016-11-01	0	2	2	140	3.4	11	gravel	concrete + vegetation	14.8333
2016-11-01	3	3	6	150	1.7	13	gravel	concrete + boulder	26.2333
2016-11-01	1	4	5	160	1.3	13	gravel	concrete + boulder	32
2016-11-01	2	4	6	170	2.2	40	gravel	concrete + boulder	7.1
2016-11-01	0	3	3	180	1.8	27	gravel	concrete + vegetation	34.9667
2016-11-01	0	1	1	190	1.5	17	gravel	concrete + vegetation	49.8333
2016-11-01	1	0	1	200	1.6	14	gravel	concrete + vegetation	26.2667
2016-11-01	0	1	1	210	1.3	8	gravel	concrete + gravel	55.0667
2016-11-01	1	1	2	220	3	18	gravel	vegetation	25.3333
2016-11-01	1	6	7	230	2.2	9	gravel	vegetation	22.6667
2016-11-01	1	2	3	240	2.2	11	gravel	concrete + vegetation	20.6
2016-11-01	0	0	0	250	2.2	8	gravel	concrete + boulder	40.2667
2016-11-01	0	1	1	260	1.9	13	gravel	boulder	33.7667
2016-11-01	0	0	0	270	2.2	16	gravel	concrete + boulder	64.6
2016-11-01	0	2	2	280	2.2	8	gravel	boulder	22.5667
2016-11-01	5	2	7	290	1.9	48	gravel	boulder	8.26667
2016-11-01	2	0	2	300	2.7	9	gravel	boulder	30.1667
2016-11-01	1	0	1	310	2	75	mud	concrete + boulder	4.96667
2016-11-01	0	0	0	320	3.3	3	concrete or bedrock	concrete	52.9333
2016-11-01	0	0	0	330	2.9	5	concrete or bedrock	concrete	54.8667
2016-11-01	0	0	0	340	2.9	4	concrete or bedrock	concrete	44.7
2016-11-01	0	0	0	350	2.7	3	concrete or bedrock	concrete	38.5333
2016-11-01	1	0	1	360	0.5	18	boulder	boulder	35.3
2016-11-01	0	0	0	370	2.8	28	gravel	boulder	20.1667
2016-11-01	1	0	1	380	3.5	40	gravel	boulder	18.6
2016-11-01	0	0	0	390	3.6	13	gravel	boulder	38.0667
2016-11-01	0	0	0	400	2	15	gravel	boulder	19.6
2016-11-01	0	0	0	410	5	20	boulder	boulder	24
2016-11-01	1	0	1	420	3.6	52	gravel	boulder	36.2
2016-11-01	0	0	0	430	3	15	gravel	boulder	63.2
2016-11-01	0	0	0	440	1.6	13	gravel	boulder	54.4333
2016-11-01	0	0	0	450	1.4	30	gravel	boulder	11.3667
2016-11-01	0	0	0	460	1.3	28	gravel	boulder	26.4333
2016-11-01	0	0	0	470	1.7	36	gravel	boulder	14.0667
2016-11-01	0	0	0	480	1.4	14	boulder	boulder	35.8
2016-11-01	0	0	0	490	1.5	24	boulder	boulder	6.83333
2016-11-01	0	0	0	500	3	12	mud	boulder	13.0667
2016-11-01	0	0	0	510	6.1	20	gravel	boulder	39.1667
2017-07-01	0	0	0	20	8.4	38	sand	sand	6.33333
2017-07-01	1	0	1	30	7.4	45	sand	concrete + vegetation	4.36667
2017-07-01	4	0	4	40	7.2	72	mud + boulder	concrete + vegetation	4.3
2017-07-01	10	0	10	50	7.9	48	mud + boulder	concrete + gravel	3.73333
2017-07-01	12	0	12	60	7.9	38	mud	concrete + boulder	4.5
2017-07-01	0	0	0	70	8	25	gravel	concrete + vegetation	8.8
2017-07-01	1	0	1	80	4.7	26	gravel	concrete + vegetation	4.8
2017-07-01	2	0	2	90	4.1	26	gravel	concrete + vegetation	8.63333
2017-07-01	2	4	6	100	3.7	16	gravel	concrete + vegetation	8.03333
2017-07-01	0	0	0	110	3.7	11	gravel	concrete	13.9333
2017-07-01	0	0	0	120	3.7	5	gravel	concrete	20.9333
2017-07-01	0	0	0	130	3.5	8	gravel	concrete + gravel	11.7333
2017-07-01	1	0	1	140	3.4	11	gravel	concrete + vegetation	14.8333
2017-07-01	0	0	0	150	1.7	13	gravel	concrete + boulder	26.2333
2017-07-01	2	6	8	160	1.3	13	gravel	concrete + boulder	32
2017-07-01	1	0	1	170	2.2	40	gravel	concrete + boulder	7.1
2017-07-01	0	0	0	180	1.8	27	gravel	concrete + vegetation	34.9667
2017-07-01	0	0	0	190	1.5	17	gravel	concrete + vegetation	49.8333
2017-07-01	0	0	0	200	1.6	14	gravel	concrete + vegetation	26.2667
2017-07-01	0	0	0	210	1.3	8	gravel	concrete + gravel	55.0667
2017-07-01	0	0	0	220	3	18	gravel	vegetation	25.3333
2017-07-01	0	0	0	230	2.2	9	gravel	vegetation	22.6667
2017-07-01	0	4	4	240	2.2	11	gravel	concrete + vegetation	20.6
2017-07-01	0	0	0	250	2.2	8	gravel	concrete + boulder	40.2667
2017-07-01	0	3	3	260	1.9	13	gravel	boulder	33.7667
2017-07-01	0	0	0	270	2.2	16	gravel	concrete + boulder	64.6
2017-07-01	0	2	2	280	2.2	8	gravel	boulder	22.5667
2017-07-01	2	0	2	290	1.9	48	gravel	boulder	8.26667
2017-07-01	0	0	0	300	2.7	9	gravel	boulder	30.1667
2017-07-01	2	0	2	310	2	75	mud	concrete + boulder	4.96667
2017-07-01	0	0	0	320	3.3	3	concrete or bedrock	concrete	52.9333
2017-07-01	0	0	0	330	2.9	5	concrete or bedrock	concrete	54.8667
2017-07-01	0	0	0	340	2.9	4	concrete or bedrock	concrete	44.7
2017-07-01	0	0	0	350	2.7	3	concrete or bedrock	concrete	38.5333
2017-07-01	0	0	0	360	0.5	18	boulder	boulder	35.3
2017-07-01	0	0	0	370	2.8	28	gravel	boulder	20.1667
2017-07-01	0	0	0	380	3.5	40	gravel	boulder	18.6
2017-07-01	0	0	0	390	3.6	13	gravel	boulder	38.0667
2017-07-01	0	0	0	400	2	15	gravel	boulder	19.6
2017-07-01	0	0	0	410	5	20	boulder	boulder	24
2017-07-01	0	0	0	420	3.6	52	gravel	boulder	36.2
2017-07-01	0	0	0	430	3	15	gravel	boulder	63.2
2017-07-01	0	0	0	440	1.6	13	gravel	boulder	54.4333
2017-07-01	0	0	0	450	1.4	30	gravel	boulder	11.3667
2017-07-01	0	0	0	460	1.3	28	gravel	boulder	26.4333
2017-07-01	0	0	0	470	1.7	36	gravel	boulder	14.0667
2017-07-01	0	0	0	480	1.4	14	boulder	boulder	35.8
2017-07-01	0	0	0	490	1.5	24	boulder	boulder	6.83333
2017-07-01	0	0	0	500	3	12	mud	boulder	13.0667
2017-07-01	1	0	1	510	6.1	20	gravel	boulder	39.1667
2018-09-01	0	0	0	20	8.4	38	sand	sand	6.33333
2018-09-01	0	0	0	30	7.4	45	sand	concrete + vegetation	4.36667
2018-09-01	0	0	0	40	7.2	72	mud + boulder	concrete + vegetation	4.3
2018-09-01	0	0	0	50	7.9	48	mud + boulder	concrete + gravel	3.73333
2018-09-01	1	0	1	60	7.9	38	mud	concrete + boulder	4.5
2018-09-01	0	0	0	70	8	25	gravel	concrete + vegetation	8.8
2018-09-01	1	1	2	80	4.7	26	gravel	concrete + vegetation	4.8
2018-09-01	0	0	0	90	4.1	26	gravel	concrete + vegetation	8.63333
2018-09-01	0	0	0	100	3.7	16	gravel	concrete + vegetation	8.03333
2018-09-01	0	0	0	110	3.7	11	gravel	concrete	13.9333
2018-09-01	1	0	1	120	3.7	5	gravel	concrete	20.9333
2018-09-01	0	3	3	130	3.5	8	gravel	concrete + gravel	11.7333
2018-09-01	1	5	6	140	3.4	11	gravel	concrete + vegetation	14.8333
2018-09-01	1	2	3	150	1.7	13	gravel	concrete + boulder	26.2333
2018-09-01	0	8	8	160	1.3	13	gravel	concrete + boulder	32
2018-09-01	7	0	7	170	2.2	40	gravel	concrete + boulder	7.1
2018-09-01	6	3	9	180	1.8	27	gravel	concrete + vegetation	34.9667
2018-09-01	4	2	6	190	1.5	17	gravel	concrete + vegetation	49.8333
2018-09-01	7	3	10	200	1.6	14	gravel	concrete + vegetation	26.2667
2018-09-01	3	0	3	210	1.3	8	gravel	concrete + gravel	55.0667
2018-09-01	2	3	5	220	3	18	gravel	vegetation	25.3333
2018-09-01	3	3	6	230	2.2	9	gravel	vegetation	22.6667
2018-09-01	9	0	9	240	2.2	11	gravel	concrete + vegetation	20.6
2018-09-01	1	0	1	250	2.2	8	gravel	concrete + boulder	40.2667
2018-09-01	0	0	0	260	1.9	13	gravel	boulder	33.7667
2018-09-01	0	0	0	270	2.2	16	gravel	concrete + boulder	64.6
2018-09-01	1	0	1	280	2.2	8	gravel	boulder	22.5667
2018-09-01	8	0	8	290	1.9	48	gravel	boulder	8.26667
2018-09-01	3	2	5	300	2.7	9	gravel	boulder	30.1667
2018-09-01	2	0	2	310	2	75	mud	concrete + boulder	4.96667
2018-09-01	0	0	0	320	3.3	3	concrete or bedrock	concrete	52.9333
2018-09-01	0	0	0	330	2.9	5	concrete or bedrock	concrete	54.8667
2018-09-01	0	0	0	340	2.9	4	concrete or bedrock	concrete	44.7
2018-09-01	0	0	0	350	2.7	3	concrete or bedrock	concrete	38.5333
2018-09-01	2	0	2	360	0.5	18	boulder	boulder	35.3
2018-09-01	0	0	0	370	2.8	28	gravel	boulder	20.1667
2018-09-01	0	0	0	380	3.5	40	gravel	boulder	18.6
2018-09-01	0	0	0	390	3.6	13	gravel	boulder	38.0667
2018-09-01	0	0	0	400	2	15	gravel	boulder	19.6
2018-09-01	0	0	0	410	5	20	boulder	boulder	24
2018-09-01	2	0	2	420	3.6	52	gravel	boulder	36.2
2018-09-01	0	0	0	430	3	15	gravel	boulder	63.2
2018-09-01	0	0	0	440	1.6	13	gravel	boulder	54.4333
2018-09-01	0	0	0	450	1.4	30	gravel	boulder	11.3667
2018-09-01	0	0	0	460	1.3	28	gravel	boulder	26.4333
2018-09-01	0	0	0	470	1.7	36	gravel	boulder	14.0667
2018-09-01	2	1	3	480	1.4	14	boulder	boulder	35.8
2018-09-01	1	0	1	490	1.5	24	boulder	boulder	6.83333
2018-09-01	0	0	0	500	3	12	mud	boulder	13.0667
2018-09-01	0	0	0	510	6.1	20	gravel	boulder	39.1667

## Sheet: individual eel data
date	TL	BW	eel_name	recatch	site
2016-08-08	398	117	887196	no	360
2016-08-08	522	310	8877C9	no	370
2016-08-08	376	98	886AC1	no	290
2016-08-08	491	225	8870D0	no	400
2016-08-08	612	545	81B5766	no	400
2016-08-08	311	54	81B577B	no	410
2016-08-08	402	120	81B576C	no	410
2016-08-08	253	28	81B5779	no	420
2016-08-08	584	420	81B575A	no	420
2016-08-08	354	78	81B5752	no	430
2016-08-08	218	16	8869B3	no	440
2016-08-08	595	465	886E90	no	440
2016-08-08	276	35	886D37	no	440
2016-08-08	407	142	81B5753	no	450
2016-08-08	506	248	81B5775	no	450
2016-08-08	406	136	81B5750	no	460
2016-08-08	404	125	81B5758	no	460
2016-08-08	263	30	81B576D	no	480
2016-08-08	250	27	81B5754	no	490
2016-08-08	453	169	81B5768	no	500
2016-08-09	414	157	81B5739	no	20
2016-08-09	250	29	81B5777	no	20
2016-08-09	164	7	-	no	20
2016-08-09	400	130	81B5730	no	30
2016-08-09	359	97	81B5724	yes	40
2016-08-09	551	430	81B574D	no	40
2016-08-09	436	197	81B5727	no	40
2016-08-09	495	340	81B5772	no	40
2016-08-09	414	131	81B5728	yes	40
2016-08-09	352	93	81B5740	yes	40
2016-08-09	-	-	-	no	40
2016-08-09	-	-	-	no	40
2016-08-09	562	447	81B5743	yes	50
2016-08-09	498	283	81B5764	yes	50
2016-08-09	374	117	81B5748	yes	50
2016-08-09	367	89	81B5746	no	50
2016-08-09	390	113	81B575D	yes	50
2016-08-09	296	46	81B571F	yes	50
2016-08-09	460	205	81B5776	no	50
2016-08-09	315	60	81B577F	no	50
2016-08-09	276	39	81B5735	no	50
2016-08-09	568	459	81B573C	no	50
2016-08-09	451	207	81B5770	yes	50
2016-08-09	297	52	81B575E	no	60
2016-08-09	533	355	81B571E	yes	60
2016-08-09	473	251	81B5721	yes	60
2016-08-09	364	100	81B576B	no	60
2016-08-09	340	69	81B5736	no	60
2016-08-09	305	51	81B574A	no	60
2016-08-09	460	187	81B572F	yes	60
2016-08-09	397	113	81B5722	yes	60
2016-08-09	246	27	81B577D	no	60
2016-08-09	590	528	81B5700	no	60
2016-08-09	500	275	81B572B	yes	60
2016-08-09	458	211	81B575F	no	60
2016-08-09	490	245	81B5738	no	60
2016-08-09	505	352	81B5769	no	60
2016-08-09	520	366	81B5731	no	60
2016-08-09	402	116	81B5749	yes	60
2016-08-09	432	182	81B572D	no	60
2016-08-09	427	150	81B5723	yes	60
2016-08-09	452	183	81B5761	no	60
2016-08-09	397	119	81B5720	yes	80
2016-08-09	375	112	81B5767	no	80
2016-08-09	285	39	81B571D	no	80
2016-08-09	347	80	81B5729	no	90
2016-08-09	566	428	81B576F	yes	100
2016-08-09	264	29	81B577E	no	100
2016-08-09	170	7	VIE 7	yes	100
2016-08-09	127	3	-	no	100
2016-08-09	121	3	VIE 2	yes	100
2016-08-09	69	0.5	-	no	110
2016-08-09	90	0.5	-	no	120
2016-08-09	70	0.5	-	no	120
2016-08-09	62	0.5	-	no	120
2016-08-09	64	0.5	-	no	120
2016-08-09	419	119	81B573E	no	120
2016-08-09	240	20	881FEF4	yes	160
2016-08-09	136	3	-	no	160
2016-08-09	185	9	VIE 5	yes	160
2016-08-09	189	7	VIE 9	yes	170
2016-08-09	485	218	81B576A	yes	170
2016-08-09	386	97	81B575B	no	170
2016-08-09	410	141	81B5745	yes	170
2016-08-09	386	88	81B573A	no	170
2016-08-09	283	37	-	no	170
2016-08-09	423	146	81B5763	no	180
2016-08-09	553	338	81B5751	no	180
2016-08-09	372	102	81B5737	no	180
2016-08-09	370	101	81B574C	yes	180
2016-08-09	239	20	-	no	180
2016-08-09	431	147	81B5762	no	180
2016-08-09	145	4	-	no	180
2016-08-09	585	653	81B575C	no	190
2016-08-09	168	6	-	no	190
2016-08-09	223	17	-	no	190
2016-08-09	215	14	-	no	190
2016-08-09	276	35	-	no	190
2016-08-09	72	0.5	-	no	190
2016-08-09	560	363	81B577A	no	200
2016-08-09	610	461	81B572E	no	200
2016-08-09	380	105	81B577C	yes	200
2016-08-09	298	48	VIE 6	yes	200
2016-08-09	249	24	-	no	200
2016-08-09	452	176	81B5755	yes	210
2016-08-09	334	73	81B5744	no	210
2016-08-09	202	12	-	no	210
2016-08-09	107	2	-	no	210
2016-08-09	92	0.5	-	no	210
2016-08-09	89	0.5	-	no	210
2016-08-09	-	-	-	no	210
2016-08-09	176	8	-	no	210
2016-08-09	164	6	-	no	210
2016-08-09	463	205	-	no	220
2016-08-09	305	52	-	no	220
2016-08-09	445	175	81B5760	no	220
2016-08-09	355	75	81B576E	no	220
2016-08-09	223	18	-	no	220
2016-08-09	149	6	-	no	220
2016-08-09	417	122	81B5725	yes	230
2016-08-09	273	32	-	no	230
2016-08-09	390	104	81B574B	no	230
2016-08-09	233	19	881FEC2	yes	230
2016-08-09	297	40	-	no	230
2016-08-09	204	13	VIE 8	yes	230
2016-08-09	167	6	-	no	230
2016-08-09	148	5	VIE 3	yes	240
2016-08-09	216	14	-	no	250
2016-08-09	137	3	-	no	250
2016-08-09	107	1	-	no	250
2016-08-09	402	115	81B5756	yes	260
2016-08-09	555	427	81B5732	no	270
2016-08-09	480	218	81B5741	no	270
2016-08-09	283	41	81B573F	no	270
2016-08-09	355	83	81B574E	no	280
2016-08-09	308	45	81B5759	no	280
2016-08-09	280	35	-	no	280
2016-08-09	183	10	-	no	280
2016-08-09	151	6	-	no	280
2016-08-09	351	77	81B5747	no	290
2016-08-09	191	12	VIE 1	yes	290
2016-08-09	410	133	81B5742	yes	290
2016-08-09	194	12	-	no	290
2016-08-09	382	101	81B5774	no	300
2016-08-09	315	56	-	no	300
2016-08-09	182	183	-	no	300
2016-08-09	495	271	81B5773	yes	300
2016-08-09	462	206	81B574F	no	300
2016-08-09	232	19	-	no	300
2016-08-09	630	592	81B572C	no	310
2016-08-09	451	198	81B573B	no	310
2016-08-09	134	4	-	no	350
2016-11-02	572	446	9770981	no	220
2016-11-02	157	5	-	no	220
2016-11-02	496	256	81B576A	yes	170
2016-11-02	302	48	9771BF2	no	170
2016-11-02	196	12	-	no	170
2016-11-02	200	12	-	no	170
2016-11-02	165	7	-	no	170
2016-11-02	78	0.5	-	no	170
2016-11-02	455	132	81B5725	yes	150
2016-11-02	433	172	9736071	no	150
2016-11-02	242	25	9771B79	no	150
2016-11-02	189	11	VIE 9	yes	150
2016-11-02	202	12	-	no	150
2016-11-02	96	0.5	-	no	150
2016-11-02	293	44	97717B6	no	230
2016-11-02	205	13	VIE 8	yes	230
2016-11-02	172	7	VIE 7	yes	230
2016-11-02	147	5	VIE 4	yes	230
2016-11-02	131	4	-	no	230
2016-11-02	112	2	-	no	230
2016-11-02	100	0.5	-	no	230
2016-11-02	109	0.5	-	no	210
2016-11-02	130	4	-	no	190
2016-11-02	237	22	9771A3A	no	120
2016-11-02	82	0.5	-	no	140
2016-11-02	227	19	-	no	140
2016-11-02	512	292	9771A72	no	100
2016-11-02	298	48	VIE 6	yes	200
2016-11-02	185	11	VIE 5	yes	160
2016-11-02	110	3	-	no	160
2016-11-02	118	3	-	no	160
2016-11-02	333	65	973612F	no	160
2016-11-02	236	23	973637E	no	160
2016-11-02	140	4	-	no	180
2016-11-02	103	0.5	-	no	180
2016-11-02	91	0.5	-	no	180
2016-11-02	234	22	-	no	260
2016-11-02	480	231	9770BB4	no	310
2016-11-02	191	10	-	no	280
2016-11-02	160	6	-	no	280
2016-11-03	340	67	9771697	yes	240
2016-11-03	122	3	-	no	240
2016-11-03	95	2	-	no	240
2016-11-03	408	135	9771B21	no	300
2016-11-03	342	75	97714F0	no	300
2016-11-03	565	453	9772056	yes	290
2016-11-03	459	206	97704E1	no	290
2016-11-03	370	85	9771740	no	290
2016-11-03	410	131	81B5742	yes	290
2016-11-03	286	37	9771B3A	no	290
2016-11-03	230	20	-	no	290
2016-11-03	205	14	-	no	290
2016-11-04	427	156	81B5723	yes	60
2016-11-04	512	284	81B5764	yes	60
2016-11-04	440	145	9736113	no	60
2016-11-04	386	119	87359E5	yes	60
2016-11-04	600	461	9771B90	no	60
2016-11-04	476	240	977152C	yes	60
2016-11-04	361	90	81B5724	yes	60
2016-11-04	506	270	81B572B	yes	60
2016-11-04	467	203	97702EF	no	60
2016-11-04	584	409	9771B1D	no	60
2016-11-04	377	110	81B5748	yes	60
2016-11-04	590	496	81B576F	yes	60
2016-11-04	405	122	81B5722	yes	80
2016-11-04	478	248	81B5721	yes	40
2016-11-04	417	130	81B5728	yes	40
2016-11-04	224	16	-	no	70
2016-11-04	342	70	9770701	no	90
2016-11-04	355	92	81B5740	yes	90
2016-11-04	225	19	-	no	90
2016-11-04	145	7	-	no	90
2016-11-04	113	4	-	no	90
2016-11-04	473	220	81B572F	yes	50
2016-11-04	543	368	81B571E	yes	50
2016-11-04	480	267	97721D3	no	50
2016-11-04	393	110	81B575D	yes	50
2016-11-05	244	23	-	no	360
2016-11-05	454	212	97711B7	yes	420
2016-11-05	541	310	977139B	no	380
2017-07-28	173	7	-	no	260
2017-07-28	163	7	-	no	260
2017-07-28	117	2	-	no	260
2017-07-28	173	8	-	no	240
2017-07-28	162	6	VIE 4	yes	240
2017-07-28	152	4	VIE 3	yes	240
2017-07-28	139	4	VIE 2	yes	240
2017-07-28	224	16	881FEC9	yes	280
2017-07-28	205	12	VIE 1	yes	280
2017-07-28	539	332	879855E	yes	290
2017-07-28	427	11	879850A	no	290
2017-07-28	540	316	8798561	no	510
2017-07-28	656	692	879851C	yes	310
2017-07-28	510	292	81B5773	yes	310
2017-07-29	362	103	879850C	no	60
2017-07-29	442	168	81B5749	yes	60
2017-07-29	453	208	8798526	no	60
2017-07-29	423	172	87359E5	yes	60
2017-07-29	450	191	81B5723	yes	60
2017-07-29	615	622	8798558	no	60
2017-07-29	600	630	81B576F	yes	60
2017-07-29	515	320	81B572B	yes	60
2017-07-29	497	290	8798551	no	60
2017-07-29	380	107	879854A	no	60
2017-07-29	473	280	8798555	no	50
2017-07-29	580	523	81B5743	yes	50
2017-07-29	513	311	81B572F	yes	50
2017-07-29	465	248	8798554	no	50
2017-07-29	360	96	879853A	no	50
2017-07-29	397	103	81B5720	yes	50
2017-07-29	301	49	8798557	no	50
2017-07-29	325	61	81B571F	yes	50
2017-07-29	514	357	81B5721	yes	40
2017-07-29	436	180	81B575D	yes	40
2017-07-29	443	181	8798523	no	40
2017-07-29	381	118	81B5724	yes	40
2017-07-29	400	129	879850F	no	30
2017-07-29	70	0.5	-	no	100
2017-07-29	105	0.5	881FEBB	yes	100
2017-07-29	117	3	-	no	100
2017-07-29	172	7	881FED5	yes	100
2017-07-29	247	27	879854E	no	100
2017-07-29	244	25	8798564	no	100
2017-07-29	119	3	-	no	160
2017-07-29	107	3	-	no	160
2017-07-29	165	7	-	no	160
2017-07-29	184	11	-	no	160
2017-07-29	176	9	-	no	160
2017-07-29	182	11	-	no	160
2017-07-29	246	6	879851A	no	160
2017-07-29	522	356	977152C	yes	160
2017-07-29	270	43	8798549	no	140
2017-07-29	499	269	879853E	no	90
2017-07-29	494	306	81B5770	yes	90
2017-07-29	508	322	8798506	no	60
2017-07-29	355	87	8798529	no	60
2017-07-29	256	30	977053D	no	80
2017-07-29	424	167	81B5745	yes	170
2017-07-29	455	195	9771597	yes	50
2017-07-29	306	50	879DDC5	no	50
2018-09-24	436	185	81B577C	yes	190
2018-09-24	334	77	881FED8	no	190
2018-09-24	349	72	881FEA3	no	190
2018-09-24	235	22	881FEA0	no	190
2018-09-24	294	46	881FEA5	no	190
2018-09-24	222	20	881FE9E	no	190
2018-09-24	343	77	881FECC	no	150
2018-09-24	198	13	881FEAA	no	150
2018-09-24	210	15	881FEAB	no	150
2018-09-24	240	23	881FEF4	yes	160
2018-09-24	220	19	881FEBE	no	160
2018-09-24	191	11	881FEB5	no	160
2018-09-24	187	12	881FEB1	no	160
2018-09-24	171	8	-	no	160
2018-09-24	163	7	-	no	160
2018-09-24	126	4	-	no	160
2018-09-24	113	3	-	no	160
2018-09-24	530	413	881FEBD	no	180
2018-09-24	610	569	881FEEA	no	180
2018-09-24	600	495	881FEED	no	180
2018-09-24	428	183	81B574C	yes	180
2018-09-24	391	120	881FEE3	no	180
2018-09-24	379	105	881FEB0	no	180
2018-09-24	145	6	-	no	180
2018-09-24	156	7	-	no	180
2018-09-24	123	4	-	no	180
2018-09-24	307	53	881FEBC	no	120
2018-09-24	215	18	881FEA8	no	130
2018-09-24	173	10	881FEBB	yes	130
2018-09-24	130	4	-	no	130
2018-09-24	399	140	881FEAD	no	140
2018-09-24	189	12	881FECD	no	140
2018-09-24	223	18	881FEE1	no	140
2018-09-24	149	6	-	no	140
2018-09-24	134	5	-	no	140
2018-09-24	235	21	881FEC7	no	140
2018-09-24	575	473	881FECA	no	170
2018-09-24	562	436	881FED2	no	170
2018-09-24	508	265	881FEF9	no	170
2018-09-24	507	288	9771597	yes	170
2018-09-24	450	221	881FEAC	no	170
2018-09-24	472	215	881FEE4	no	170
2018-09-24	444	168	881FED0	no	170
2018-09-24	600	552	881FEB2	yes	200
2018-09-24	470	257	881FEF6	no	200
2018-09-24	485	228	881FE9C	no	200
2018-09-24	495	253	881FEDC	no	200
2018-09-24	405	145	881FECB	no	200
2018-09-24	270	38	881FEFA	yes	200
2018-09-24	213	19	881FEF7	no	200
2018-09-24	380	36	881FED9	no	200
2018-09-24	220	18	881FEC0	no	200
2018-09-24	165	8	-	no	200
2018-09-24	285	40	881FEB9	no	220
2018-09-24	290	42	881FE9B	no	220
2018-09-24	237	22	881FEC4	no	220
2018-09-24	228	21	881FED3	no	220
2018-09-24	144	4	-	no	220
2018-09-24	317	61	881FEC2	yes	210
2018-09-24	295	46	881FEA6	no	210
2018-09-24	279	37	881FE9A	no	210
2018-09-26	307	53	881FED5	yes	480
2018-09-26	302	50	881FEF2	no	480
2018-09-26	186	10	881FEC1	no	480
2018-09-26	622	564	881FEDB	no	360
2018-09-26	500	223	881FEB8	no	360
2018-09-26	486	183	97711B7	yes	420
2018-09-26	379	109	881FEE7	no	420
2018-09-26	285	38	881FED6	no	490
2018-09-26	560	489	81B572F	yes	60
2018-09-26	369	99	881FEDA	no	80
2018-09-26	236	23	881FECE	no	80
2018-09-26	520	323	881FE9D	no	290
2018-09-26	435	177	81B5742	yes	290
2018-09-26	508	280	881FEF1	no	290
2018-09-26	661	664	881FEEE	no	290
2018-09-26	567	437	879855E	yes	290
2018-09-26	380	115	881FEEF	no	290
2018-09-26	285	40	881FEC8	no	290
2018-09-26	290	43	881FEE6	no	290
2018-09-26	650	798	881FEE9	no	300
2018-09-26	641	767	881FED1	no	280
2018-09-26	422	181	881FEA4	no	300
2018-09-26	346	89	881FEA2	no	300
2018-09-26	235	22	881FEC9	yes	300
2018-09-26	141	5	-	no	300
2018-09-26	560	446	881FEAE	no	240
2018-09-26	610	616	881FEB4	no	250
2018-09-26	525	337	881FEBF	no	240
2018-09-26	503	296	81B5755	yes	240
2018-09-26	510	286	881FEE0	no	240
2018-09-26	515	289	881FE9F	no	240
2018-09-26	483	251	81B5756	yes	240
2018-09-26	426	168	881FEF5	no	240
2018-09-26	395	125	881FECF	no	240
2018-09-26	355	81	881FEB6	no	240
2018-09-26	770	1219	879851C	yes	310
2018-09-26	505	297	881FED4	yes	310
2018-09-26	401	124	9771697	yes	230
2018-09-26	355	83	881FEAF	no	230
2018-09-26	308	56	881FEE8	no	230
2018-09-26	183	10	881FEB7	no	230
2018-09-26	147	5	-	no	230
2018-09-26	117	3	-	no	230
